# Supplementary material for: Laboratory Evaluation of a Quaternary Ammonium Compound-Based Antimicrobial Coating Used in Public Transport during the COVID-19 Pandemic
Source: PubMed Central journal article supplement (PMC10057021; doi:10.1128/aem.01744-22), 2023-03-01
Supplement: aem.01744-22-s0001.pdf [file aem.01744-22-s0001.pdf]

# Supplemental material

## Statistical methods

The outcome in each analysis was the logarithm of the  $\phi 6$  count and tube (with duplicate measurements) was used as the cluster variable. Adherence to model assumptions was investigated by plotting graphs of the residual or standardised residual against each of the explanatory variables and in a quantile-quantile plot in the censored and uncensored experiments respectively.

## Validation of storage conditions for $\phi 6$ suspensions

Triplicate tubes containing  $\phi 6$  in Dey-Engley neutralizing broth (DEB) were set up and periodically enumerated via plaque assays at room temperature (0, 1, 2 and 3 hours) and at 4 °C (0, 24, 48 and 168 hours). The results were analysed using uncensored linear regression with temperature and time as categorical variables (Supplementary table 2).

## Efficacy of the antimicrobial coating

Censored linear regression was performed on all experiments assessing the efficacy of the antimicrobial coating. The variables and interactions included on each of the models are shown on supplementary table 1.

### Supplemental table 1. Variables and interactions included on the statistical models.

| Experiment                                                                      | Variables                                                                                                         | Interactions                                                                                        | Results table         |
|---------------------------------------------------------------------------------|-------------------------------------------------------------------------------------------------------------------|-----------------------------------------------------------------------------------------------------|-----------------------|
| Application of the antimicrobial coating on glass coupons                       | Application method, date of experiment, contact time                                                              | NA                                                                                                  | Supplementary table 3 |
| Application of antimicrobial coating on stainless steel and polystyrene coupons | Antimicrobial coating application, days after application of antimicrobial coating, coupon material, contact time | Antimicrobial coating application, days after application of antimicrobial coating, coupon material | Supplementary table 4 |
| Interfering material evaluation with BSA and FBS                                | Antimicrobial coating application, interfering material, coupon material, contact time                            | Antimicrobial coating application, interfering material, coupon material                            | Supplementary table 5 |
| Application of the antimicrobial coating on tray tables and an armrest          | Antimicrobial coating application, days after application of antimicrobial coating                                | Antimicrobial coating application, days after application of antimicrobial coating,                 | Supplementary table 6 |

|                                                                                                                                   |                                                                                                                                            |                                                                                                                              |                       |
|-----------------------------------------------------------------------------------------------------------------------------------|--------------------------------------------------------------------------------------------------------------------------------------------|------------------------------------------------------------------------------------------------------------------------------|-----------------------|
|                                                                                                                                   | (co), interfering material, train part, contact time                                                                                       | interfering material, train part                                                                                             |                       |
| Application of the antimicrobial coating on a hand pole                                                                           | Antimicrobial coating application, days after application of antimicrobial coating, interfering material, contact time                     | Antimicrobial coating application, days after application of antimicrobial coating (co), interfering material                | Supplementary table 7 |
| Effect of wiping on efficacy of the antimicrobial coating on a train tray table in the presence of FBS as an interfering material | Antimicrobial coating application, days after application of antimicrobial coating, interfering material, train part, wiping, contact time | Antimicrobial coating application, days after application of antimicrobial coating, interfering material, train part, wiping | Supplementary table 8 |

NA – Not applicable, BSA – bovine serum albumin, FBS – foetal bovine serum, (co) – continuous variable, categorical otherwise

Where there was a continuous variable in the model, it was entered as a cubic function and successively simplified to a linear function if the highest order term was not statistically significant at each step. After doing this where applicable, each model was simplified by removing the highest order interaction term that was not statistically significant and the largest p-value or was not estimable. If a model was not estimable, the next simplest model was fitted by removal of an interaction if more than one interaction of the same order in the model or the highest order interaction term, as applicable. This process continued until either all the terms in the model were main effects or the highest order interaction(s) found to be statistically significant, together with all its (their) lower order interactions and main effects and the other variables as main effects not involved in any interaction, yielding the final model.

## Results

Supplementary tables 2-8 show the estimates, their 95% confidence intervals (CIs) and p-values from the final models. Model diagnostics, as described in the methods, revealed no major violations of modelling assumptions.

**Supplemental table 2. Validation of storage conditions for  $\phi 6$  suspensions.** There was a statistically significant difference over time in the  $\log_{10}$  counts, with time points 2 and 3 hours significantly lower, and time point 48 hours significantly higher, than time point 0. However, the range of average  $\log_{10}$  change was from -0.07 to 0.05 which, in the context of these experiments, is not considered of practical significance.

| Variable     | Category | Coeff.* | 95% CI*      | p-value |
|--------------|----------|---------|--------------|---------|
| Time (hours) | 0        | 0.00    | -            | <0.001  |
|              | 1        | -0.01   | -0.05, 0.02  |         |
|              | 2        | -0.04   | -0.08, -0.01 |         |
|              | 3        | -0.07   | -0.10, -0.03 |         |
|              | 24       | 0.00    | -0.04, 0.03  |         |
|              | 48       | 0.05    | 0.02, 0.09   |         |
|              | 168      | -0.03   | -0.07, 0.00  |         |

\*Adjusted for temperature

**Supplemental table 3. Application of the antimicrobial coating on glass coupons.**

Application of the antimicrobial coating on glass coupons resulted in significantly lower log<sub>10</sub> counts of  $\phi$ 6 than those obtained on non-coated coupons. The two methods of coating did not differ significantly from one another.

| Variable           | Category               | Coeff.* | 95% CI*      | p-value |
|--------------------|------------------------|---------|--------------|---------|
| Application method | No coating             | 0.00    | -            | <0.001  |
|                    | Manual spraying        | -3.30   | -4.34, -2.25 |         |
|                    | Pipetting (75 $\mu$ L) | -3.84   | -5.55, -2.13 |         |

\*Adjusted for date of experiment and contact time (minutes)

**Supplemental table 4. Application of antimicrobial coating on stainless steel and polystyrene coupons.**

Application of antimicrobial coating on stainless steel and polystyrene coupons resulted in significantly lower log<sub>10</sub> counts of  $\phi$ 6 than those obtained on non-coated coupons. No statistically significant differences were found between the materials or results obtained on different number of days since application of the antimicrobial coating.

| Variable                          | Category                       | Coeff.* | 95% CI*      | p-value |
|-----------------------------------|--------------------------------|---------|--------------|---------|
| Antimicrobial coating application | No coating                     | 0.00    | -            | <0.001  |
|                                   | Coating (Pipetting 40 $\mu$ L) | -6.16   | -6.94, -5.38 |         |
| Material                          | Polystyrene                    | 0.00    | -            | 0.4     |
|                                   | Stainless steel                | 0.27    | -0.39, 0.92  |         |

|                                                 |    |      |             |     |
|-------------------------------------------------|----|------|-------------|-----|
| Days after application of antimicrobial coating | 1  | 0.00 | -           | 0.4 |
|                                                 | 7  | 0.33 | -0.68, 1.34 |     |
|                                                 | 14 | 0.15 | -0.84, 1.14 |     |
|                                                 | 21 | 0.10 | -0.94, 1.13 |     |
|                                                 | 28 | 1.02 | -0.09, 2.13 |     |

\*Adjusted for contact time (minutes)

**Supplemental table 5. Interfering material evaluation.** Application of the antimicrobial coating on stainless steel and polystyrene coupons in the presence or absence of bovine serum albumin (BSA) or fetal bovine serum (FBS) as interfering materials. When FBS was applied over the antimicrobial coating the average log<sub>10</sub> counts were significantly higher compared to when BSA or no interfering material were applied. However, no difference was found between average log<sub>10</sub> counts when no interfering substance was present or when BSA was applied.

| Variable                          |                      | Coeff* | 95% CI*      | p-value             |
|-----------------------------------|----------------------|--------|--------------|---------------------|
| Antimicrobial coating application | Interfering material |        |              |                     |
| No coating                        | No material          | 0.00   | -            | <0.001 <sup>+</sup> |
|                                   | BSA                  | 0.04   | -1.04, 1.11  |                     |
|                                   | FBS                  | 0.06   | -1.01, 1.11  |                     |
| Coating                           | No material          | -6.86  | -7.96, -5.75 |                     |
|                                   | BSA                  | -7.00  | -8.41, -5.59 |                     |
|                                   | FBS                  | -2.11  | -3.25, 0.97  |                     |

\*Adjusted for coupon material and contact time (minutes) <sup>+</sup>For interaction

**Supplemental table 6. Application of the antimicrobial coating on tray tables and an armrest.** The efficacy of the antimicrobial coating was evaluated in the presence or absence of FBS as an interfering material. A significant three-way interaction was found for the train part, antimicrobial coating application and interfering material variables. The average log<sub>10</sub> reduction associated with the antimicrobial coating was significantly higher on side B compared to side A of the tray table and significantly lower for both sides when FBS was present, with no difference detected between the two materials. The presence of FBS did not significantly affect the average log<sub>10</sub> counts on tray tables when no antimicrobial coating was present. In comparison with the tray table, average log<sub>10</sub> counts on the armrest were lower but the application of the antimicrobial coating did not lead to significant reductions on this train part. A further significant interaction between days after application and coating was also found, with the per seven day decrease without a coating significant while that with a coating showed a non-significant increase, although both well within one log<sub>10</sub>.

These results are likely to reflect the differences in survival of  $\phi 6$  on different experiment days and a slight loss of efficacy of the antimicrobial coating with time.

| Variable                                               |                                   |                                          | Coeff*                                            | 95% CI*      | p-value             |
|--------------------------------------------------------|-----------------------------------|------------------------------------------|---------------------------------------------------|--------------|---------------------|
| Train part                                             | Antimicrobial coating application | Interfering material                     |                                                   |              |                     |
| Tray table (Side B-CSS)                                | No coating                        | No material                              | 0.00                                              | -            | <0.001 <sup>+</sup> |
|                                                        |                                   | FBS                                      | 0.12                                              | -0.33, 0.57  |                     |
|                                                        | Coating                           | No material                              | -4.32                                             | -5.49, -3.15 |                     |
|                                                        |                                   | FBS                                      | -0.67                                             | -1.24, -0.09 |                     |
| Tray table (Side A- HPL)                               | No coating                        | No material                              | 0.06                                              | -0.37, 0.49  |                     |
|                                                        |                                   | FBS                                      | 0.17                                              | -0.27, 0.61  |                     |
|                                                        | Coating                           | No material                              | -2.92                                             | -3.95, -1.88 |                     |
|                                                        |                                   | FBS                                      | -0.61                                             | -1.20, -0.02 |                     |
| Armrest (Terluran 22)                                  | No coating                        | No material                              | -1.08                                             | -1.53, -0.63 |                     |
|                                                        |                                   | FBS                                      | -0.67                                             | -1.10, -0.24 |                     |
|                                                        | Coating                           | No material                              | -0.67                                             | -1.10, -0.24 |                     |
|                                                        |                                   | FBS                                      | -1.04                                             | -1.62, -0.47 |                     |
| <b>Days after application of antimicrobial coating</b> |                                   | <b>Antimicrobial coating application</b> |                                                   |              |                     |
| 4-27 days                                              |                                   | No coating                               | -0.15 per week increase in days after application | -0.25, -0.04 | 0.001 <sup>+</sup>  |
|                                                        |                                   | Coating                                  | 0.04 per week increase in days after application  | -0.12, 0.21  |                     |

\*Adjusted for time (minutes) \*For interaction

**Supplemental table 7. Application of the antimicrobial coating on a hand pole.** The efficacy of the antimicrobial coating was evaluated in the presence or absence of FBS as an interfering material. A significant interaction was found between the antimicrobial coating application and the interfering material. There was a significant reduction on  $\log_{10}$  counts when the coating was applied but not when FBS was subsequently applied as an interfering material. FBS did not significantly impact  $\log_{10}$  counts when no antimicrobial coating was present. There appeared to be no significant relationship between days after application of the antimicrobial coating and the  $\log_{10}$  count.

| Variable   |                                                        |                      | Coeff* | 95% CI*      | p-value             |     |
|------------|--------------------------------------------------------|----------------------|--------|--------------|---------------------|-----|
| Train part | Antimicrobial coating application                      | Interfering material |        |              |                     |     |
| Hand pole  | No coating                                             | No material          | 0.00   | -            | <0.001 <sup>+</sup> |     |
|            |                                                        | FBS                  | 0.13   | -0.65, 0.91  |                     |     |
|            | Coating                                                | No material          | -3.87  | -5.30, -2.44 |                     |     |
|            |                                                        | FBS                  | -0.09  | -0.82, 0.65  |                     |     |
|            | <b>Days after application of antimicrobial coating</b> |                      |        |              |                     |     |
|            | 7                                                      |                      |        | 0.00         | -                   | 0.3 |
| 20         |                                                        |                      | 0.39   | -0.40, 1.17  |                     |     |

\*Adjusted for time (minutes) <sup>+</sup>For interaction

**Supplemental table 8. Effect of wiping on efficacy of the antimicrobial coating on a train tray table in the presence of FBS as an interfering material.** The impact of wiping depended on whether the material had been coated and whether FBS was present. When FBS was present, wiping did not impact the log<sub>10</sub> counts. Wiping significantly reduced the average log<sub>10</sub> counts when the coating was present but there was no interfering material. No significant difference was found for days after application of the antimicrobial coating or between the two sides of the tray table.

| Variable                                 |                      |           | Coeff* | 95% CI*      | p-value             |
|------------------------------------------|----------------------|-----------|--------|--------------|---------------------|
| Antimicrobial coating application        | Interfering material | Wiping    |        |              |                     |
| No coating                               | No material          | No wiping | 0.00   | -            | <0.001 <sup>+</sup> |
|                                          |                      | 10 wipes  | -0.04  | -0.35, 0.27  |                     |
|                                          |                      | 40 wipes  | -0.44  | -0.83, -0.05 |                     |
|                                          | FBS                  | No wiping | 0.00   | -0.27, 0.27  |                     |
|                                          |                      | 10 wipes  | 0.07   | -0.26, 0.39  |                     |
|                                          |                      | 40 wipes  | -0.17  | -0.65, 0.31  |                     |
| Coating                                  | No material          | No wiping | -3.38  | -4.26, -2.49 |                     |
|                                          |                      | 10 wipes  | -1.25  | -1.89, -0.60 |                     |
|                                          |                      | 40 wipes  | -1.34  | -1.86, -0.81 |                     |
|                                          | FBS                  | No wiping | -0.10  | -0.35, 0.15  |                     |
|                                          |                      | 10 wipes  | -0.10  | -0.40, 0.20  |                     |
|                                          |                      | 40 wipes  | -0.10  | -0.40, 0.20  |                     |
| <b>Days after application of coating</b> |                      |           |        |              |                     |
| 1                                        |                      |           | 0.00   | -            | 0.8                 |
| 2                                        |                      |           | 0.10   | -0.30, 0.51  |                     |
| 9                                        |                      |           | 0.10   | -0.46, 0.67  |                     |

|                          |       |             |      |
|--------------------------|-------|-------------|------|
| 10                       | -0.22 | -0.94, 0.50 |      |
| 11                       | -0.16 | -0.88, 0.57 |      |
| <b>Train part</b>        |       |             |      |
| Tray table (Side B-CSS)  | 0.00  | -           | 0.18 |
| Tray table (Side A- HPL) | 0.38  | -0.18, 0.94 |      |
